# Supplementary material for: Modulation of Inducible Nitric Oxide Synthase Expression in LPS-Stimulated BV-2 Microglia by Prenylated Chalcones from Cullen corylifolium (L.) Medik. through Inhibition of I-κBα Degradation
Source: MDPI journal article supplement (doi:10.3390/molecules23010109), 2018-01-04
Supplement: s1 [file s1]

## Supplementary Materials

### Spectroscopic Analysis (NMR) of compounds 1 - 3

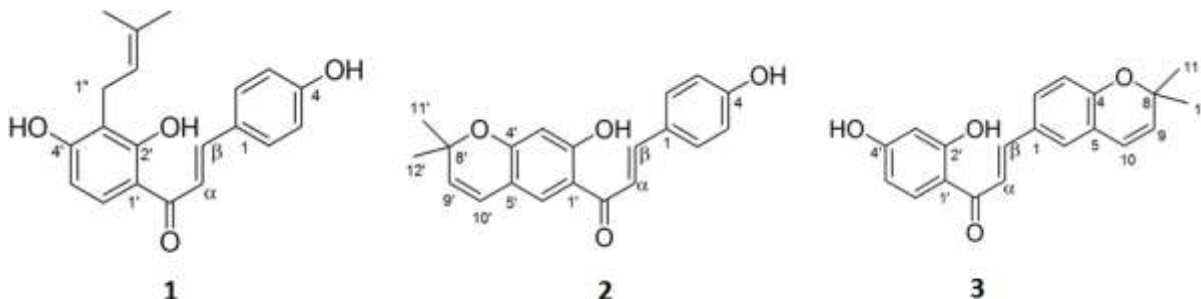

#### Compound 1 (isobavachalcone)

$^1\text{H}$  NMR ( $\text{CD}_3\text{OD}$ , 400 MHz)  $\delta$ : 7.82 (1H, d,  $J = 9.2$ , H-6'), 7.77 (1H, d,  $J = 15.6$ , H- $\beta$ ), 7.61 (1H, d,  $J = 15.6$ , H- $\alpha$ ), 7.60 (2H, d,  $J = 8.4$ , H-2, H-6), 6.84 (2H, d,  $J = 8.4$ , H-3, H-5), 6.43 (1H, d,  $J = 9.2$ , H-5'), 5.23 (1H, m, H-2''), 3.32 (1H, m, H-1''), 1.78 (3H, s, H-4''), 1.66 (3H, s, H-5'').

$^{13}\text{C}$  NMR ( $\text{CD}_3\text{OD}$ , 100 MHz)  $\delta$ : 193.7 (C=O), 165.2 (C-4'), 163.6 (C-2'), 161.5 (C-4), 145.3 (C- $\beta$ ), 131.9 (C-3''), 131.7 (C-2), 131.7 (C-6), 130.4 (C-6'), 123.6 (C-2''), 118.6 (C- $\alpha$ ), 116.9 (C-3), 116.9 (C-5), 116.6 (C-3'), 114.5 (C-1), 114.5 (C-1'), 108.2 (C-5'), 26.0 (C-5''), 22.5 (C-1''), 17.9 (C-4'').

#### Compound 2 (Bavachromene)

$^1\text{H}$  NMR ( $\text{CD}_3\text{OD} + \text{CDCl}_3$ , 400 MHz)  $\delta$ : 7.77 (1H, d,  $J = 15.2$ , H- $\beta$ ), 7.58 (1H, s, H-6'), 7.55 (2H, d,  $J = 8.8$ , H-2, H-6), 7.45 (1H, d,  $J = 15.2$ , H- $\alpha$ ), 6.84 (2H, d,  $J = 8.8$ , H-3, H-5), 6.34 (1H, d,  $J = 10.0$ , H-10'), 6.28 (1H, s, H-3'), 5.59 (1H, d,  $J = 10.0$ , H-9'), 1.42 (6H, s, H-11', H-12').

$^{13}\text{C}$  NMR ( $\text{CD}_3\text{OD} + \text{CDCl}_3$ , 100 MHz)  $\delta$ : 192.8 (C=O), 166.4 (C-4'), 161.0 (C-2'), 160.7 (C-4), 145.6 (C- $\beta$ ), 131.3 (C-2, C-6), 129.3 (C-9'), 128.3 (C-6'), 127.0 (C-1), 121.6 (C-10'), 117.5 (C- $\alpha$ ), 116.5 (C-3, C-5), 114.8 (C-1'), 114.3 (C-5'), 104.8 (C-3'), 78.6 (C-8'), 28.8 (C-11', C-12').

#### Compound 3 (kanzonol B)

$^1\text{H}$  NMR ( $\text{CD}_3\text{OD} + \text{CDCl}_3$ , 400 MHz)  $\delta$ : 7.84 (1H, d,  $J = 8.8$ , H-6'), 7.73 (1H, d,  $J = 15.2$ , H- $\beta$ ), 7.48 (1H, d,  $J = 15.2$ , H- $\alpha$ ), 7.43 (1H, dd,  $J = 2.0, 8.4$ , H-2), 7.31 (1H, d,  $J = 2.4$ , H-6), 6.77 (1H, d,  $J = 8.4$ , H-3), 6.41 (1H, dd,  $J = 2.4, 8.8$ , H-5'), 6.37 (1H, d,  $J = 9.6$ , H-10), 6.32 (1H, d,  $J = 2.4$ , H-3'), 5.69 (1H, d,  $J = 9.6$ , H-9), 1.43 (6H, s, H-11, H-12).

$^{13}\text{C}$  NMR ( $\text{CD}_3\text{OD} + \text{CDCl}_3$ , 100 MHz)  $\delta$ : 192.7 (C=O), 166.6 (C-2'), 165.5 (C-4'), 156.2 (C-4), 144.7 (C- $\beta$ ), 132.6 (C-6'), 132.0 (C-9), 130.7 (C-2), 128.3 (C-1), 127.2 (C-6), 122.2 (C-10), 122.1 (C-5), 118.4 (C- $\alpha$ ), 117.5 (C-3), 114.1 (C-1'), 108.8 (C-5'), 103.6 (C-3'), 77.8 (C-8), 28.4 (C-11, C-12).

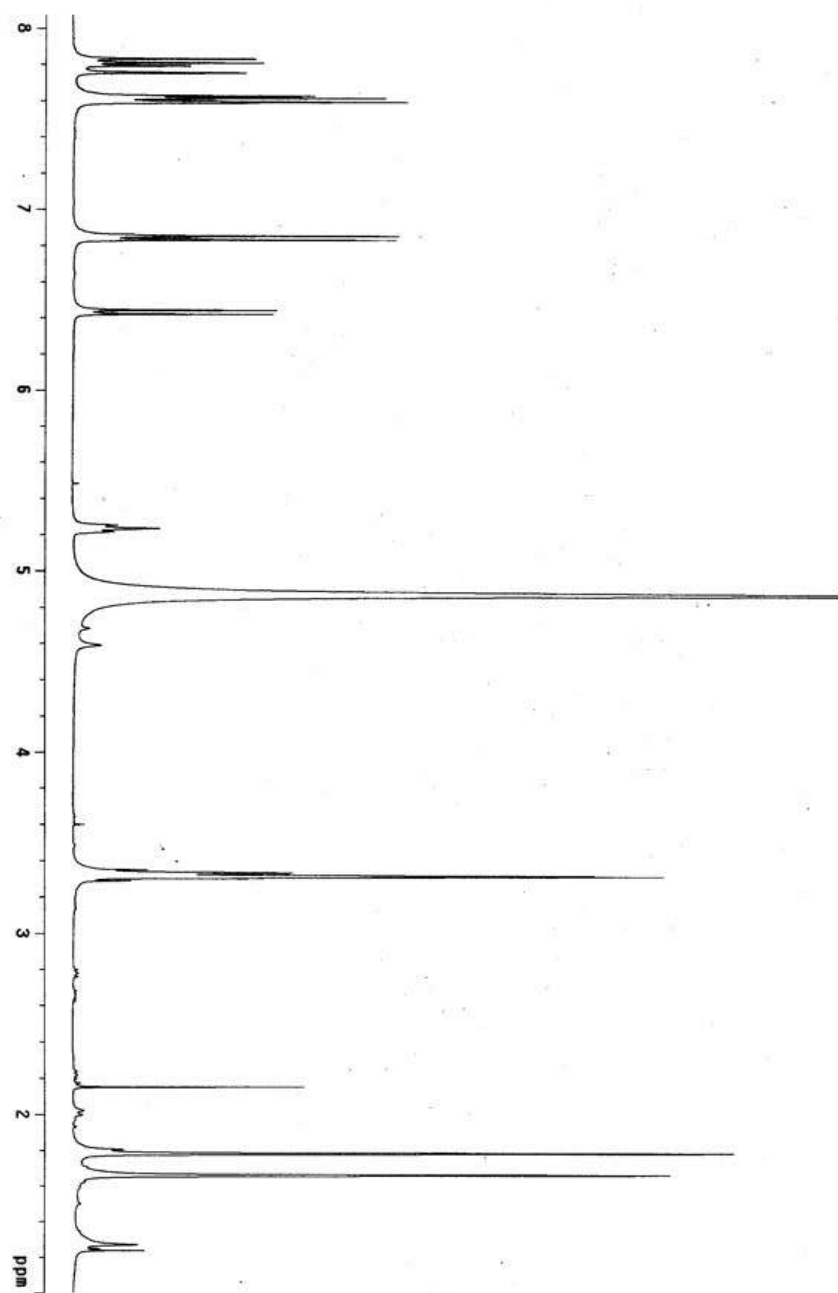

**Figure S1.**  $^1\text{H}$  NMR spectrum of compound **1** ( $\text{CD}_3\text{OD}$ , 400MHz)

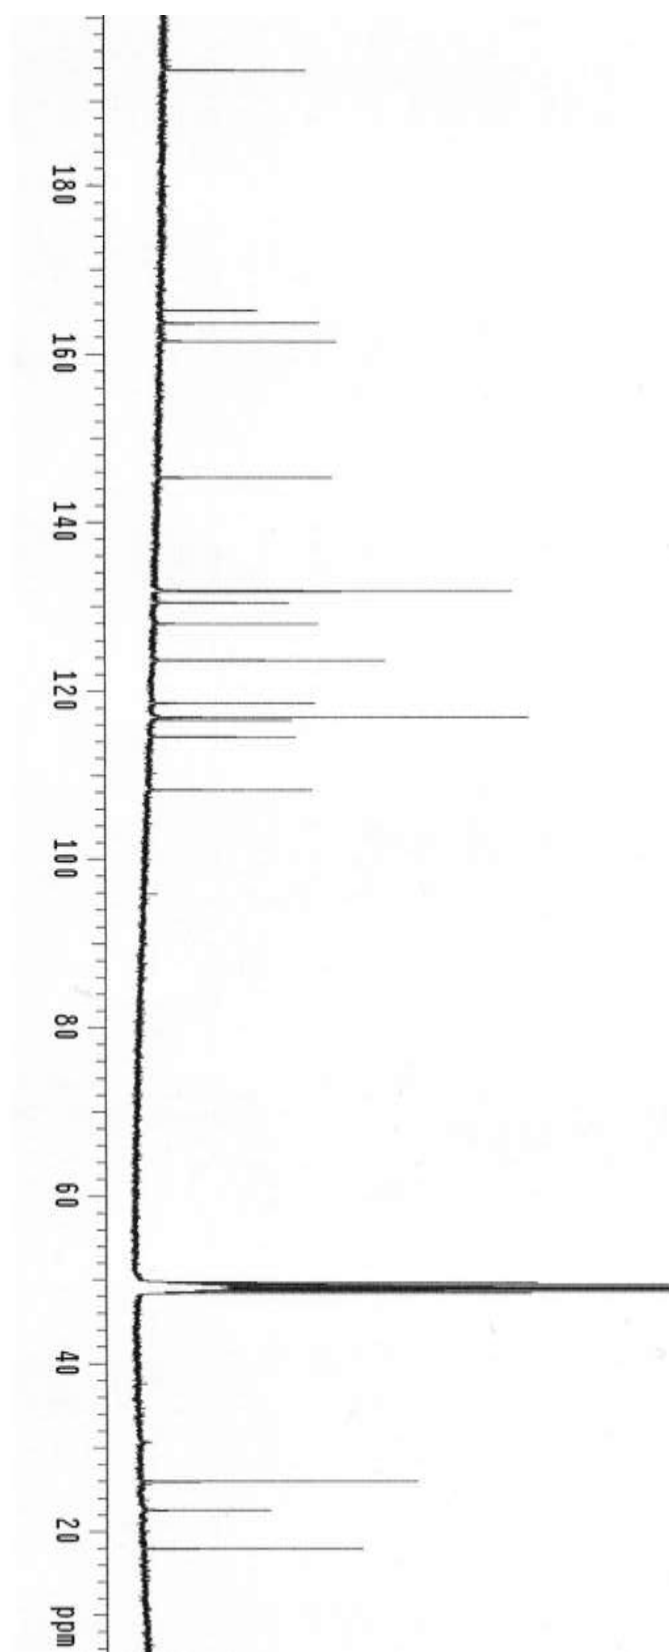

**Figure S2.**  $^{13}\text{C}$  NMR spectrum of compound **1** ( $\text{CD}_3\text{OD}$ , 100MHz)

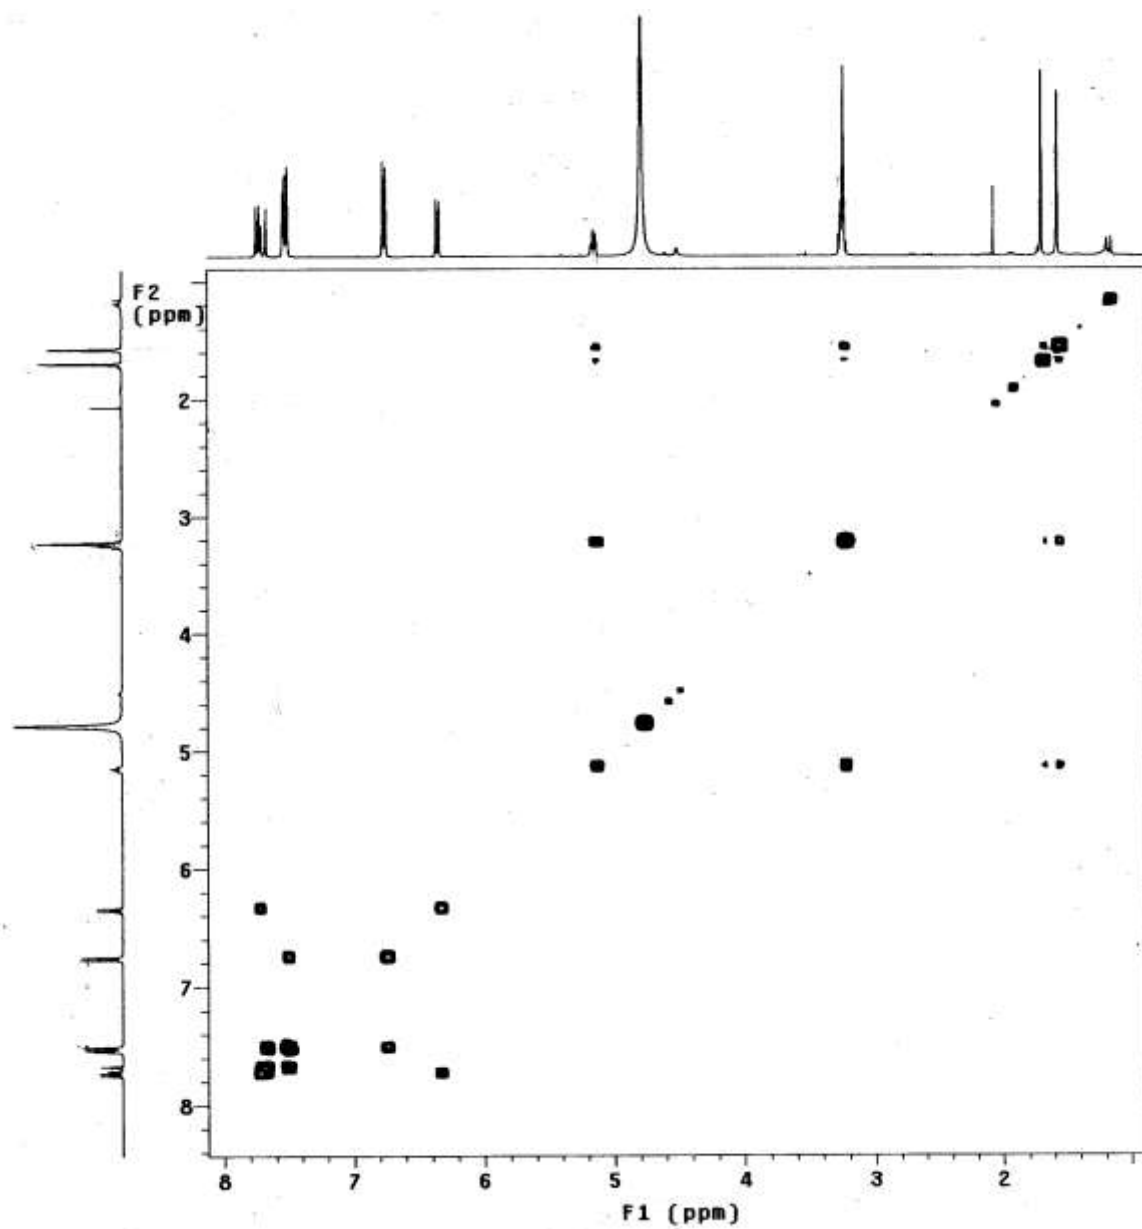

**Figure S3.**  $^1\text{H}$ - $^1\text{H}$  COSY spectrum of compound **1** ( $\text{CD}_3\text{OD}$ , 400MHz)

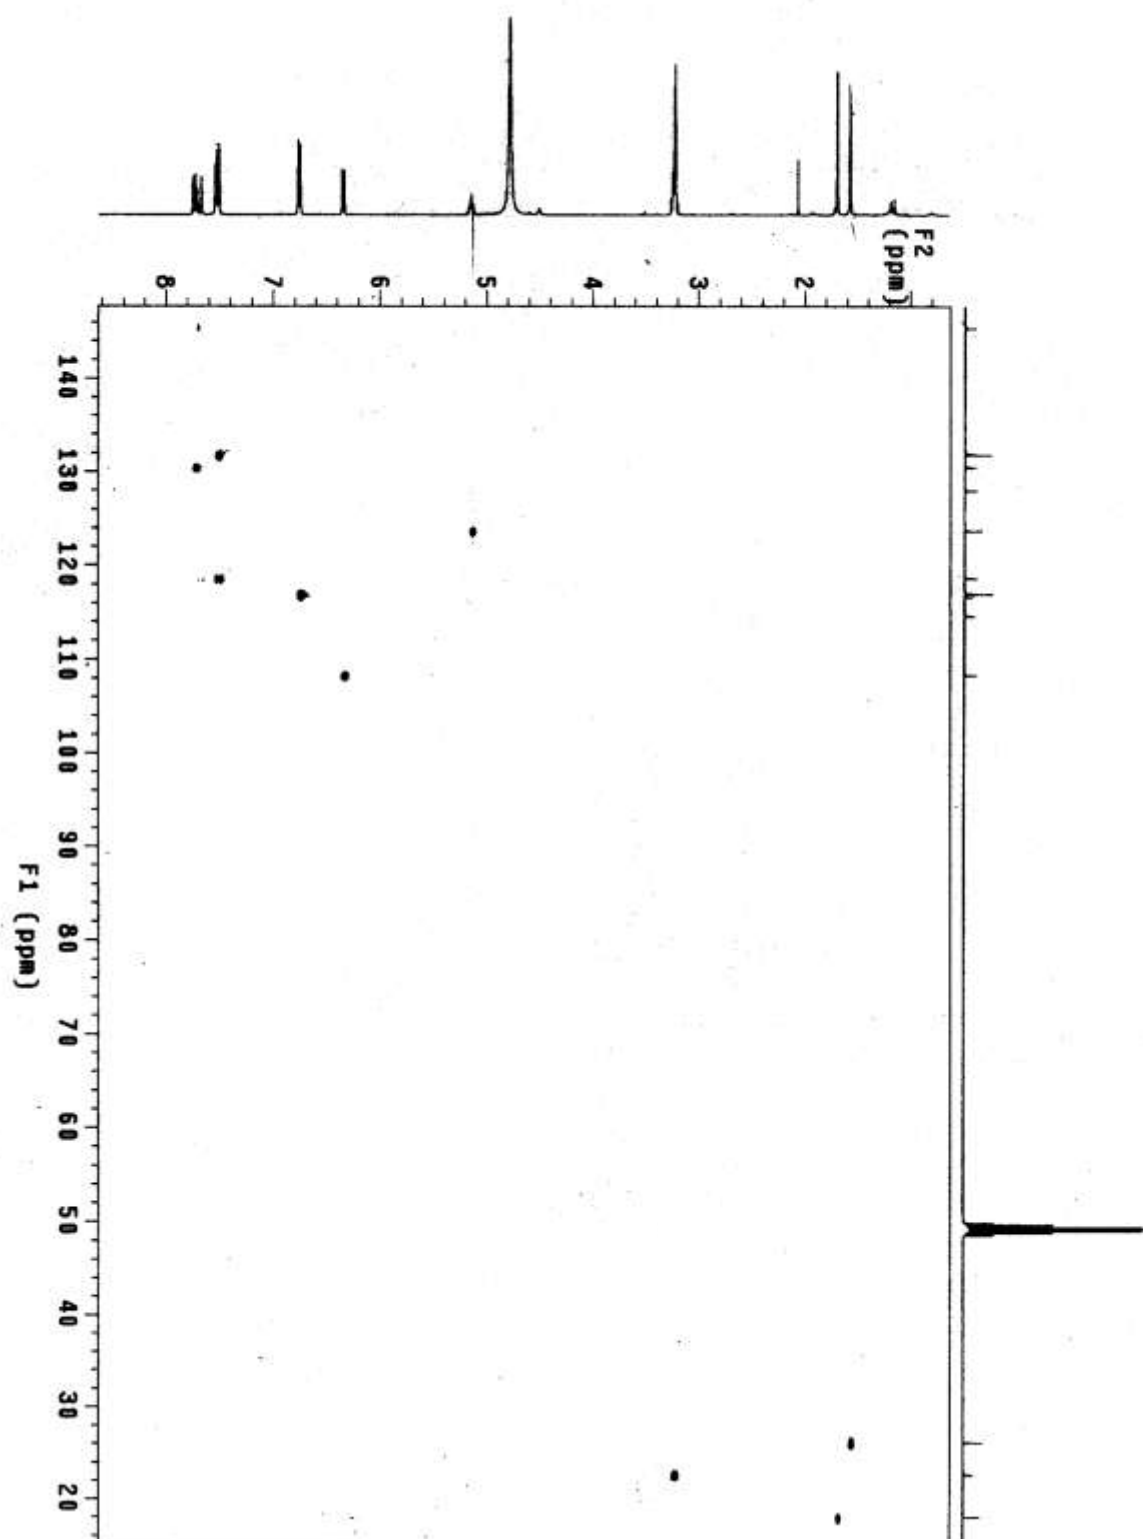

**Figure S4.** HSQC spectrum of compound **1** (CD<sub>3</sub>OD, 400MHz)

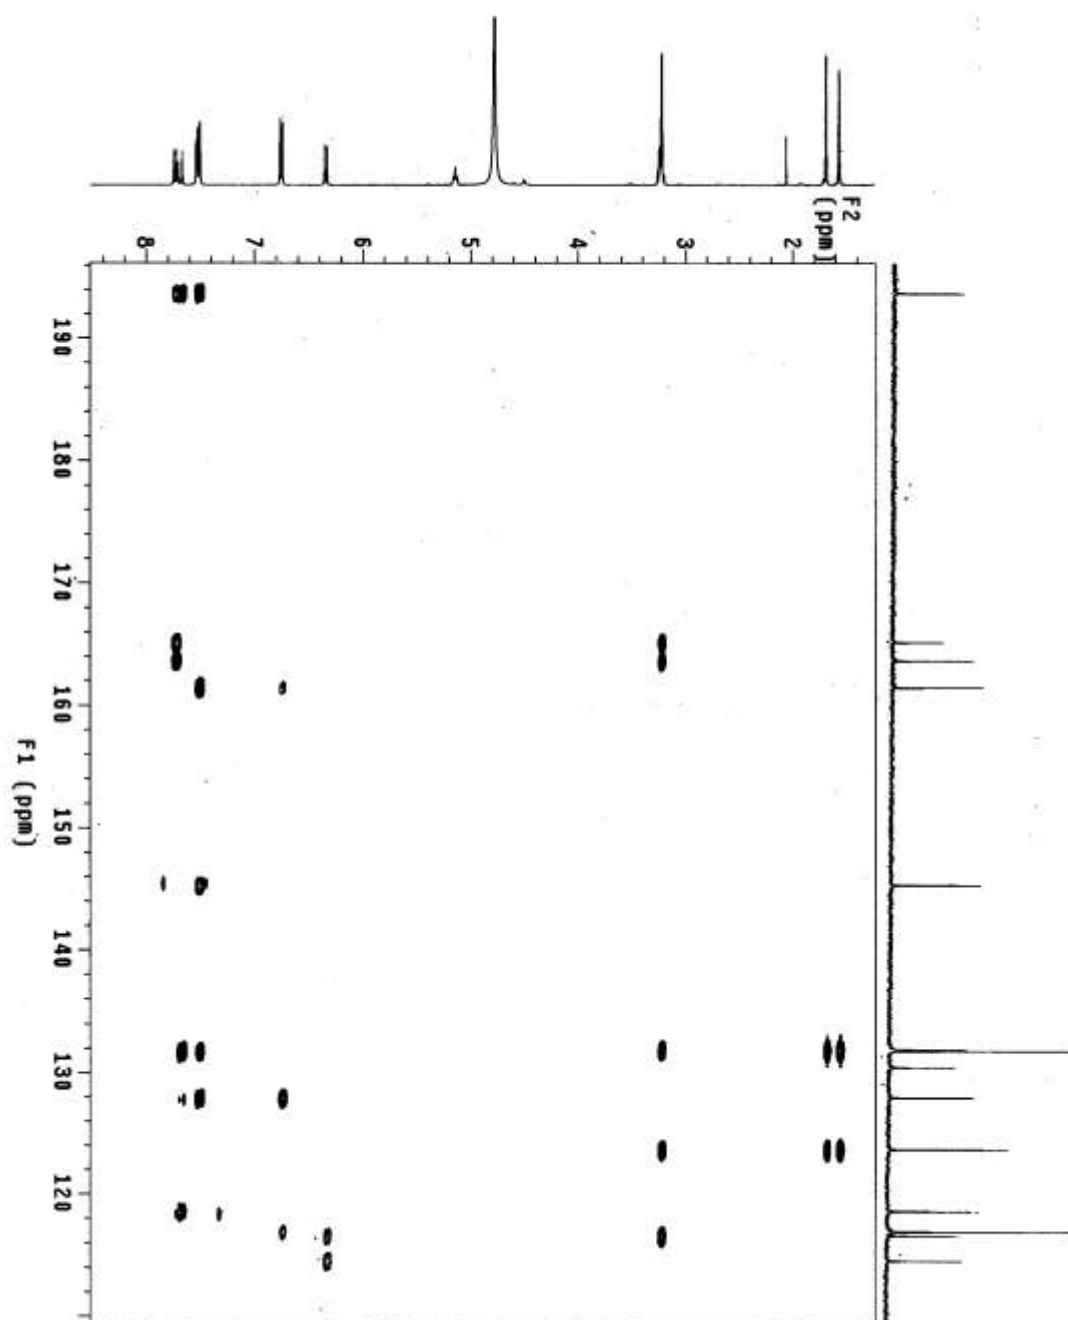

**Figure S5.** HMBC spectrum of compound **1** (CD<sub>3</sub>OD, 400MHz)

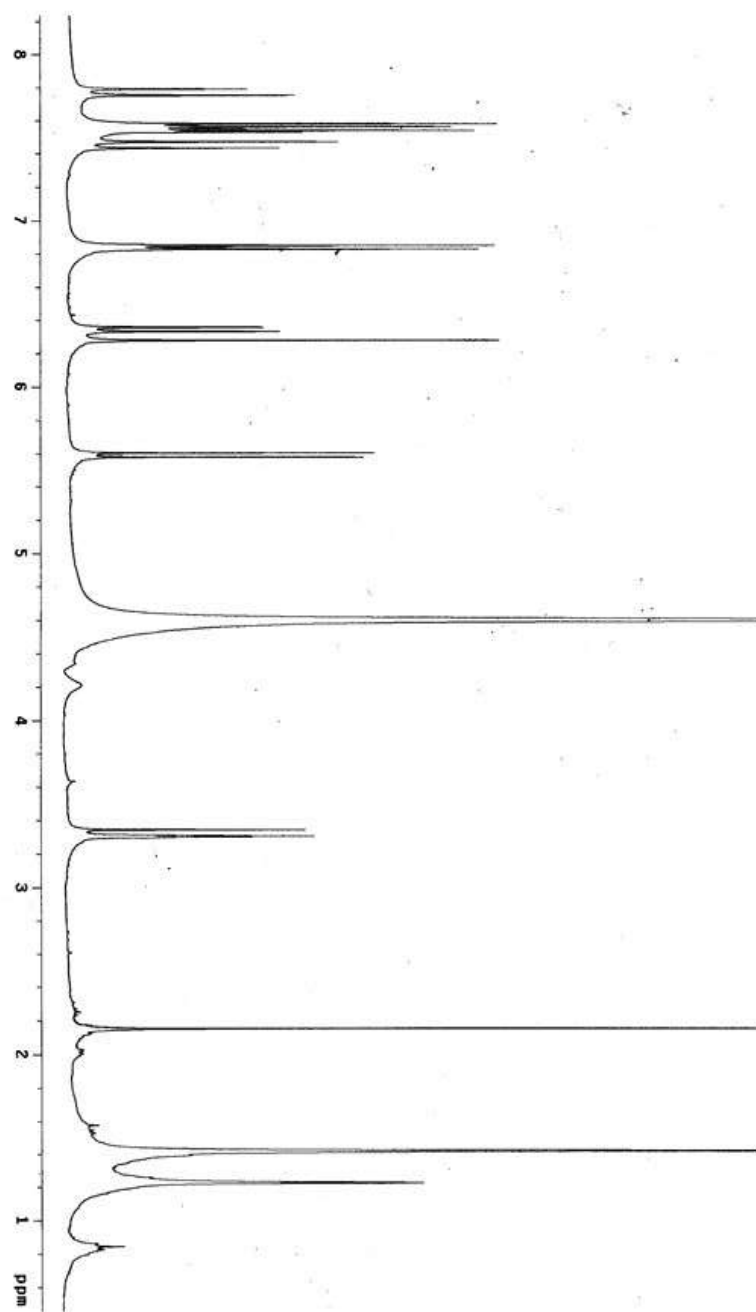

**Figure S6.**  $^1\text{H}$  NMR spectrum of compound **2** ( $\text{CD}_3\text{OD}$  +  $\text{CDCl}_3$ , 400MHz)

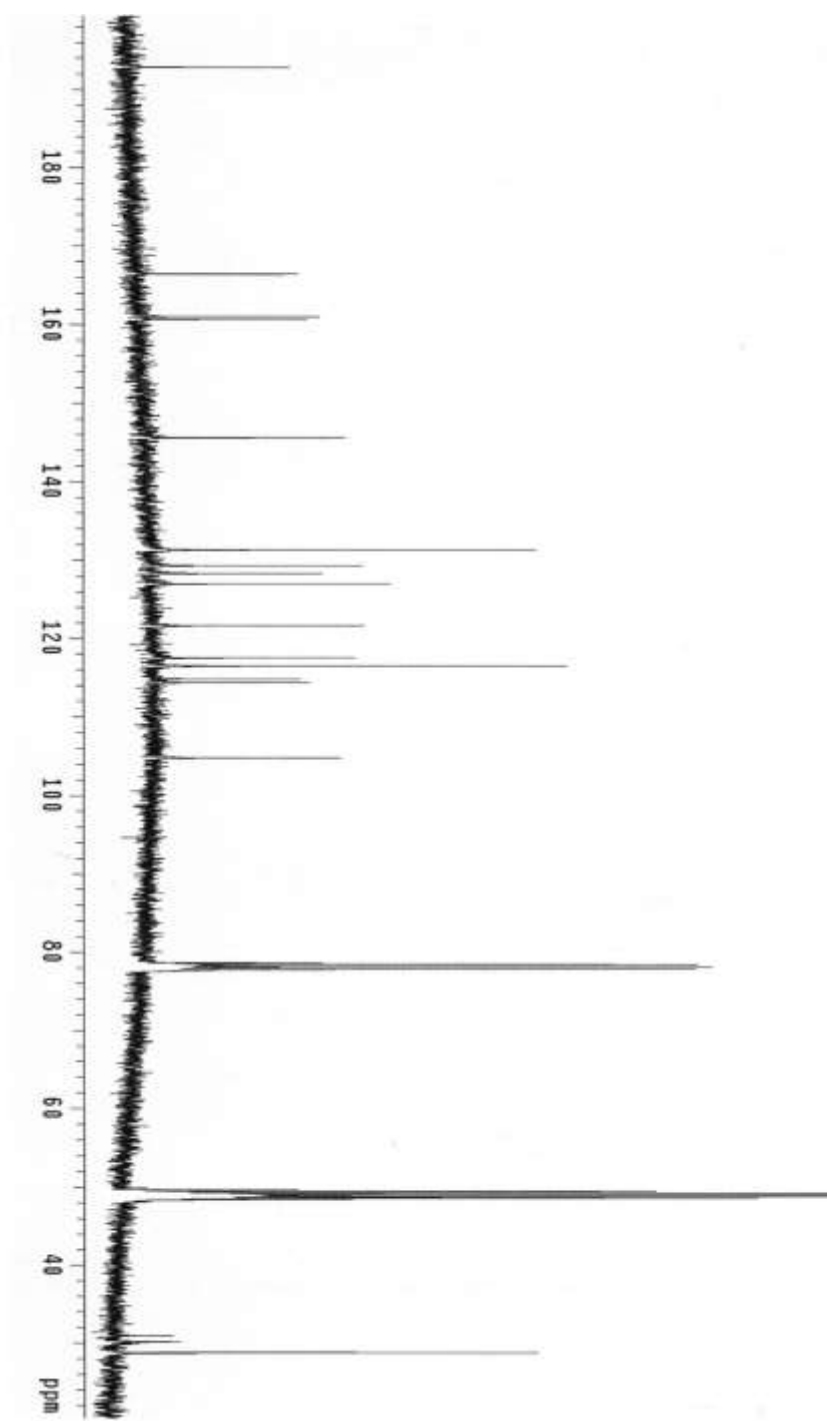

**Figure S7.**  $^{13}\text{C}$  NMR spectrum of compound **2** ( $\text{CD}_3\text{OD} + \text{CDCl}_3$ , 100MHz)



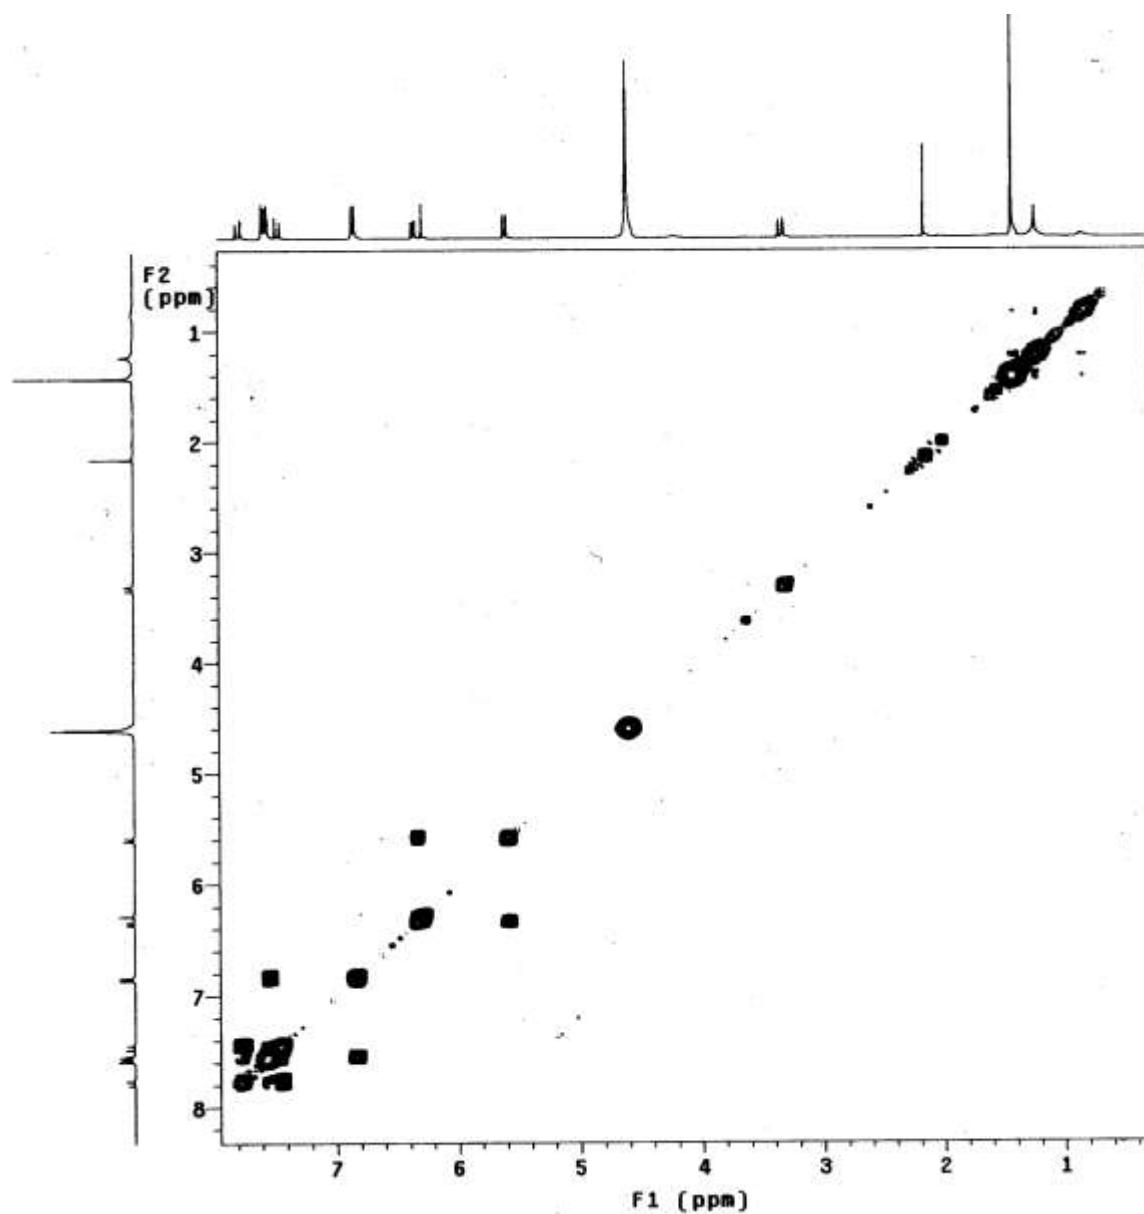

**Figure S8.**  $^1\text{H}$ - $^1\text{H}$  COSY spectrum of compound **2** ( $\text{CD}_3\text{OD} + \text{CDCl}_3$ , 400MHz)

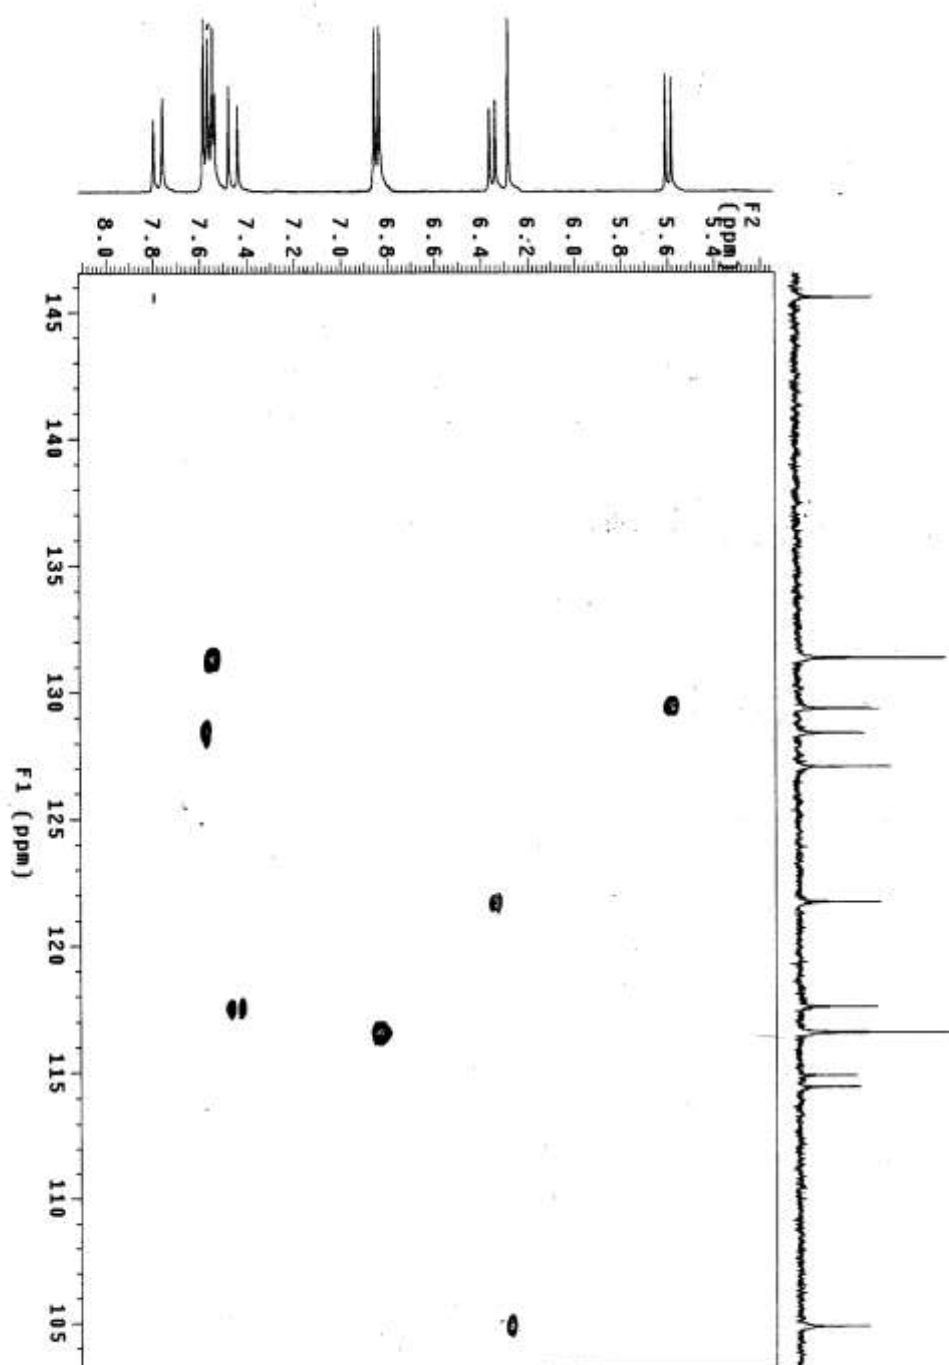

**Figure S9.** HSQC spectrum of compound **2** ( $\text{CD}_3\text{OD} + \text{CDCl}_3$ , 400MHz)

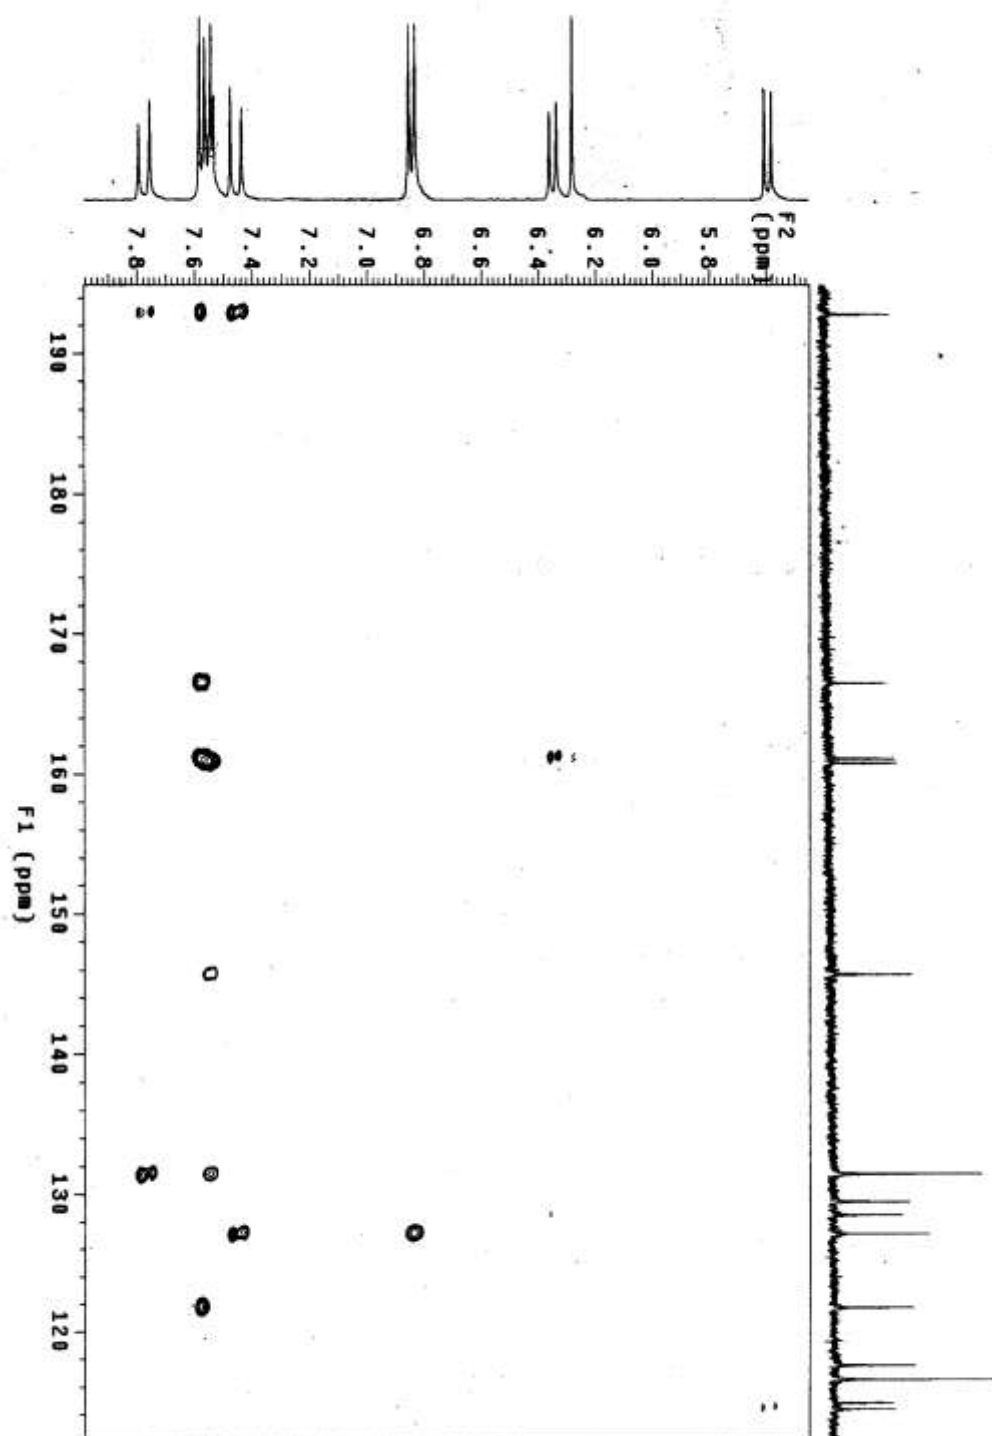

**Figure S10.** HMBC spectrum of compound **2** ( $\text{CD}_3\text{OD} + \text{CDCl}_3$ , 400MHz)

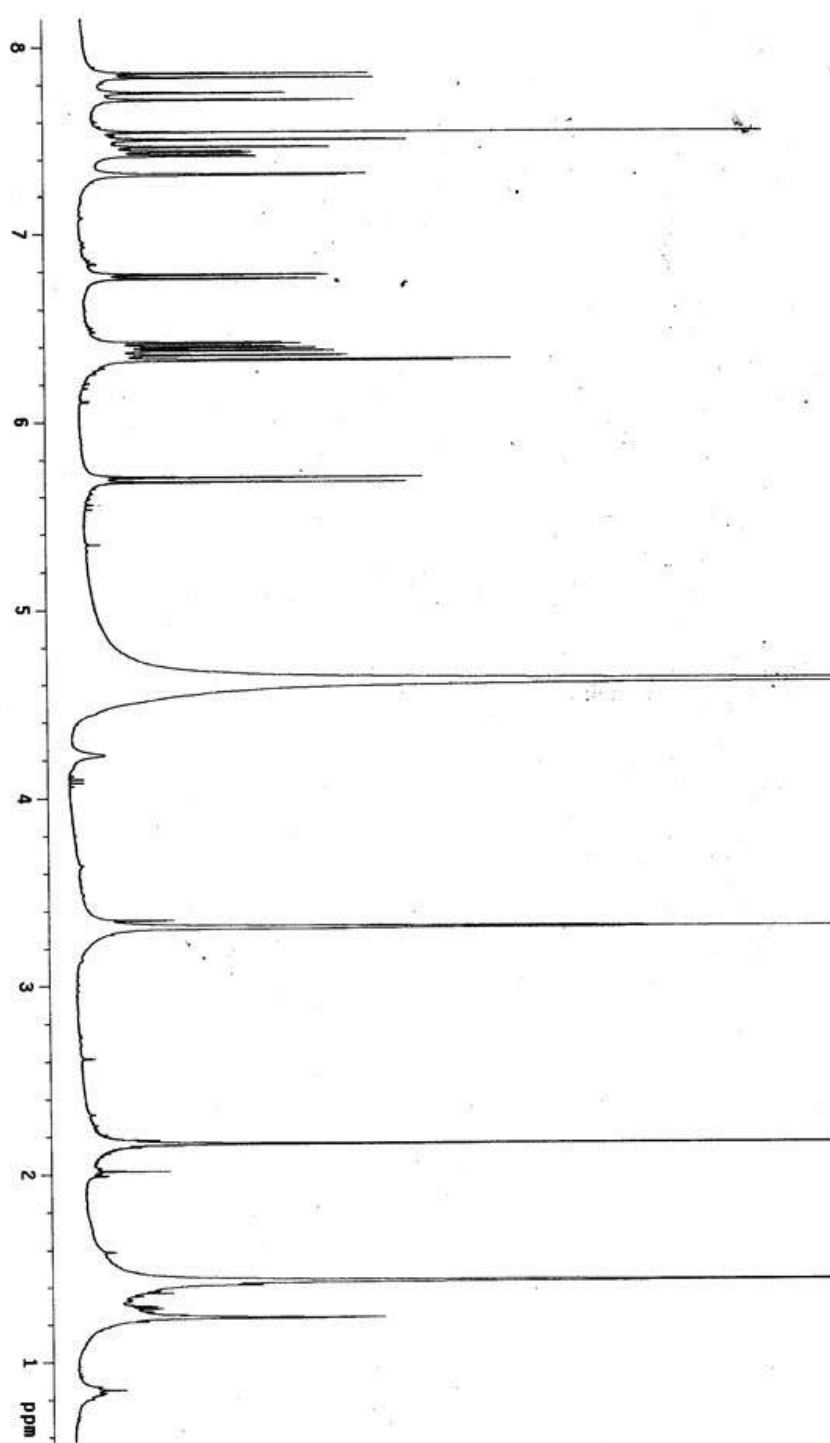

**Figure S11.**  $^1\text{H}$  NMR spectrum of compound **3** ( $\text{CD}_3\text{OD} + \text{CDCl}_3$ , 400MHz)

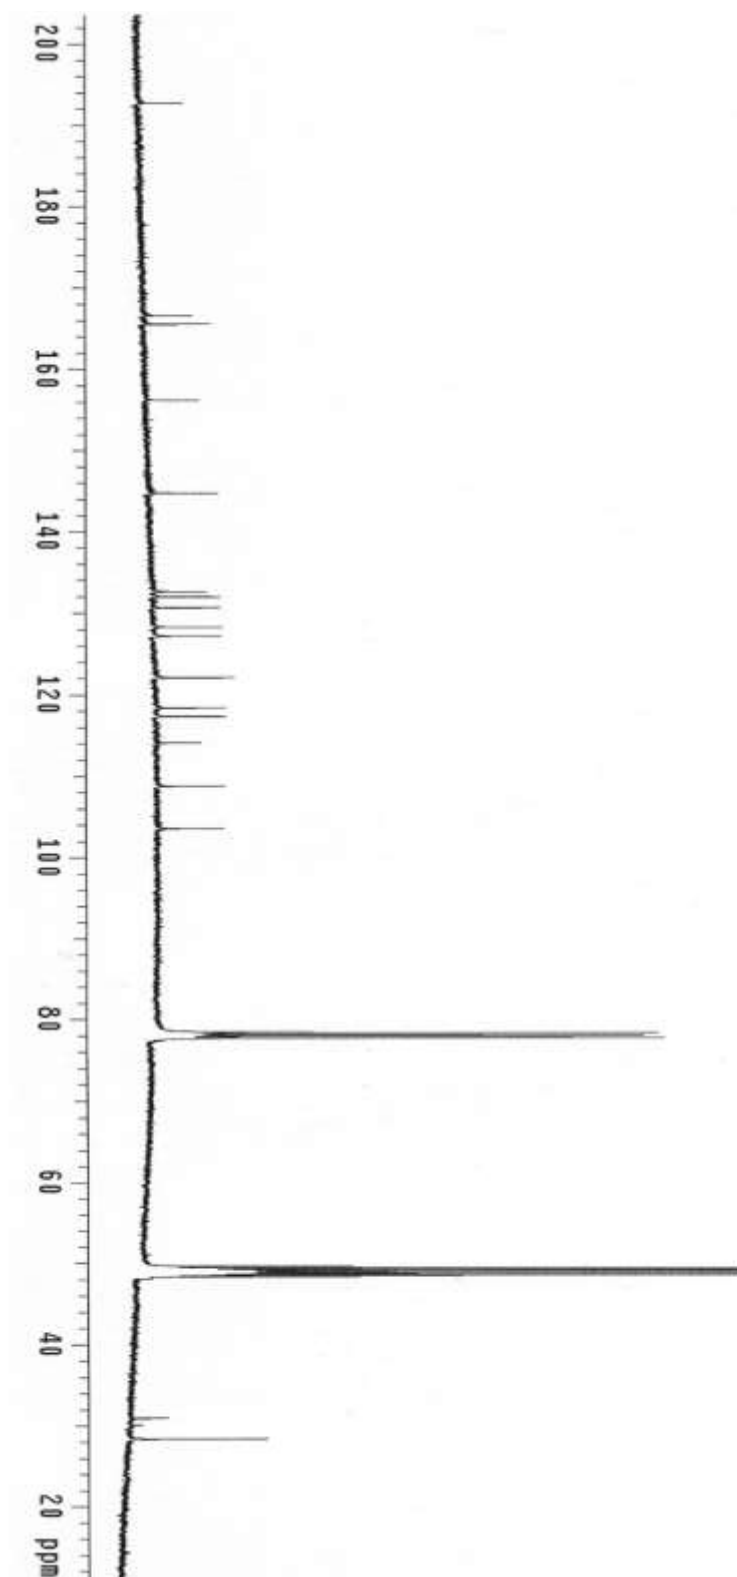

**Figure S12.**  $^{13}\text{C}$  NMR spectrum of compound **3** ( $\text{CD}_3\text{OD} + \text{CDCl}_3$ , 100MHz)

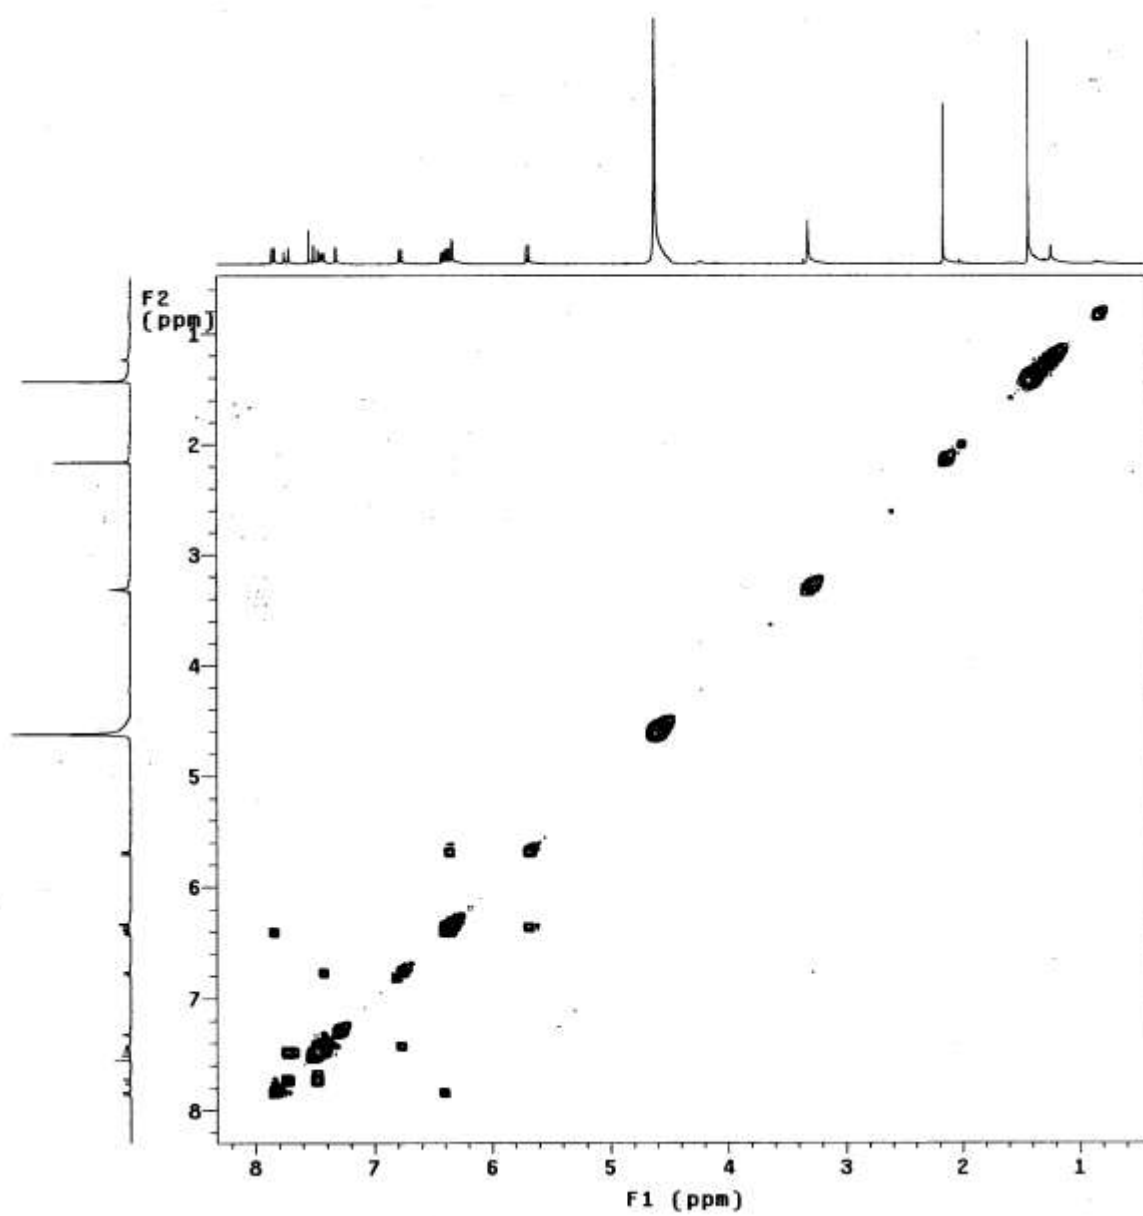

**Figure S13.**  $^1\text{H}$ - $^1\text{H}$  COSY spectrum of compound **3** ( $\text{CD}_3\text{OD} + \text{CDCl}_3$ , 400MHz)

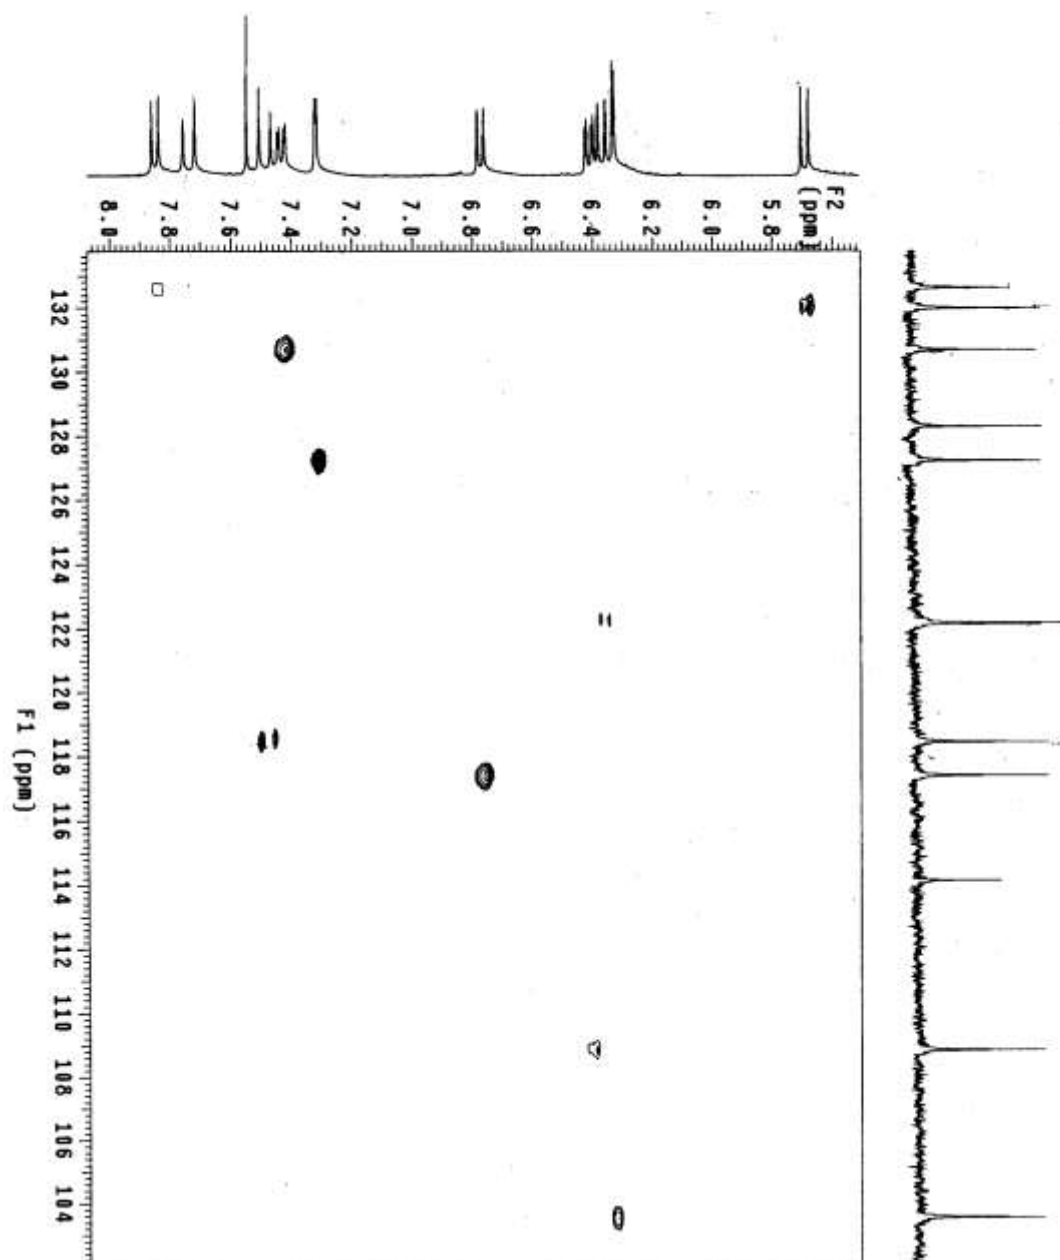

**Figure S14.** HSQC spectrum of compound **3** ( $\text{CD}_3\text{OD} + \text{CDCl}_3$ , 400MHz)

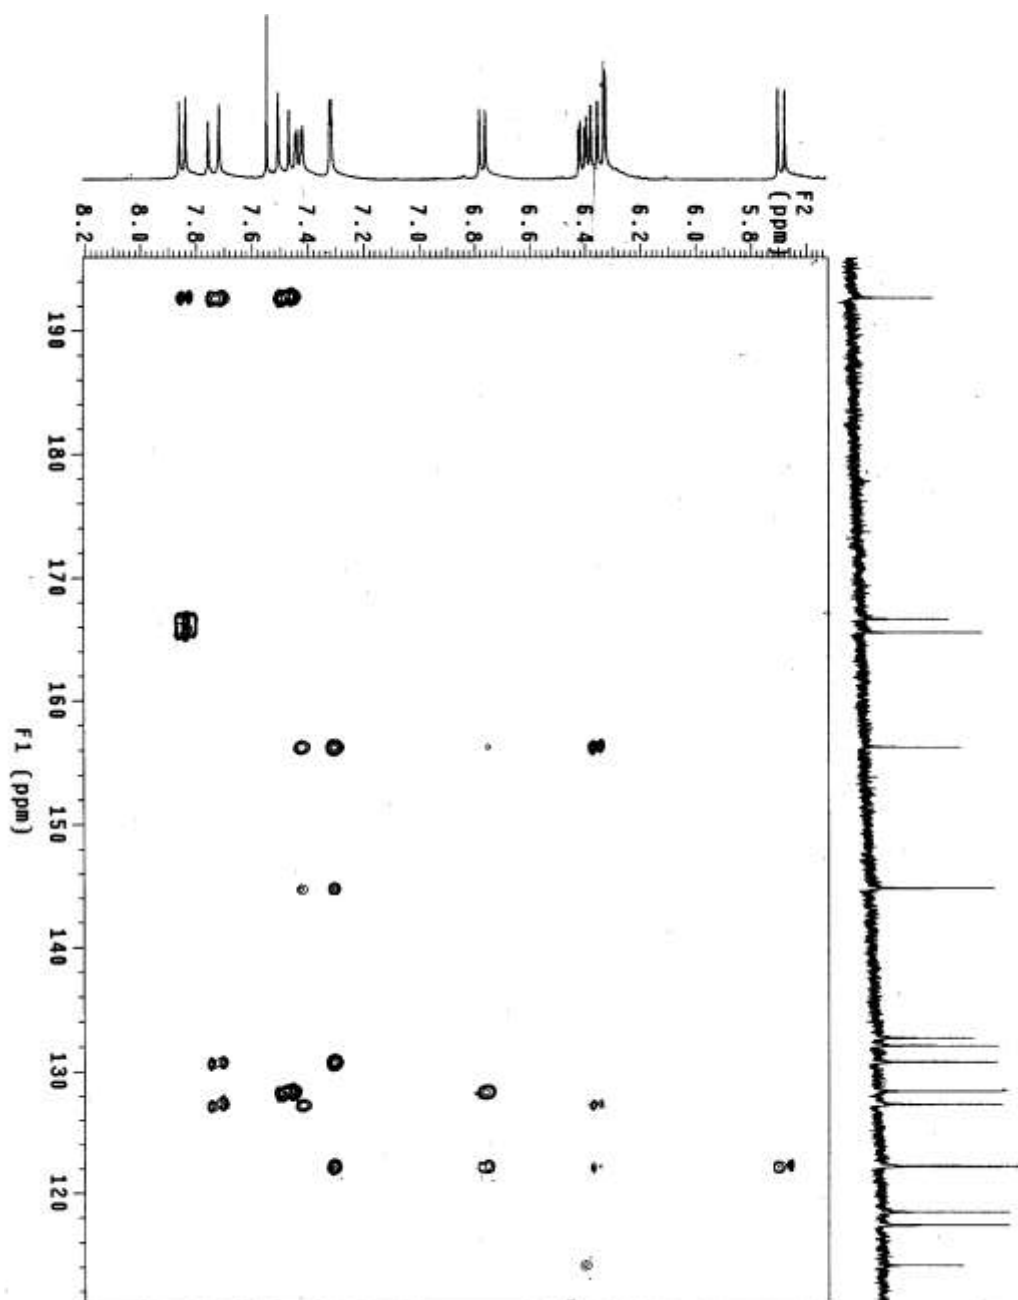

**Figure S15.** HMBC spectrum of compound **3** ( $\text{CD}_3\text{OD} + \text{CDCl}_3$ , 400MHz)
